# Supplementary material for: It Takes Time to Unravel the Ecology of War in Gaza, Palestine: Long-Term Changes in Maternal, Newborn and Toddlers’ Heavy Metal Loads, and Infant and Toddler Developmental Milestones in the Aftermath of the 2014 Military Attacks
Source: Int J Environ Res Public Health. 2020 Sep 14;17(18):6698. doi: 10.3390/ijerph17186698 (PMC7558099; doi:10.3390/ijerph17186698)
Supplement: Supplementary file 1 [file ijerph-17-06698-s001.pdf]

# Supplementary Table 1

**Table S1.** Demographic Background, Obstetric and Newborn Characteristics at birth (%).

|                                      | Participants <sup>a</sup> |     |
|--------------------------------------|---------------------------|-----|
|                                      | %                         | N   |
| Mother's age (years)                 |                           |     |
| 16–20                                | 14.5                      | 73  |
| 21–30                                | 62.9                      | 316 |
| 31–40                                | 21.1                      | 106 |
| 41–52                                | 1.4                       | 7   |
| Father's age (years)                 |                           |     |
| 18–20                                | 2.8                       | 14  |
| 21–30                                | 53.6                      | 269 |
| 31–40                                | 37.3                      | 187 |
| 41–50                                | 6.4                       | 32  |
| 51–70                                | 2.8                       | 14  |
| Number of children                   |                           |     |
| first child                          | 26.5                      | 133 |
| 1–3                                  | 53.0                      | 268 |
| 4–6                                  | 17.0                      | 85  |
| 7–10                                 | 3.5                       | 18  |
| Mother working status                |                           |     |
| Works at home                        | 88.8                      | 446 |
| Worker or entrepreneur               | 0.2                       | 1   |
| Blue collar: teacher, nurse          | 9.3                       | 46  |
| High professional                    | 0.6                       | 3   |
| Student                              | 1.2                       | 6   |
| Father working status                |                           |     |
| No work                              | 22.1                      | 111 |
| Worker                               | 49.2                      | 247 |
| Entrepreneur                         | 0.8                       | 4   |
| Blue collar: teacher, officer        | 22.5                      | 113 |
| High professional (doctor, engineer) | 2.4                       | 12  |
| Student                              | 0.8                       | 4   |
| Farmer                               | 2.2                       | 11  |
| Type of residence                    |                           |     |
| Urban area                           | 48.9                      | 244 |
| Village                              | 18.6                      | 93  |
| Refugee camp                         | 32.5                      | 162 |
| Parents' family relationship         |                           |     |
| 1 <sup>st</sup> grade cousins        | 20.5                      | 99  |
| Relatives                            | 14.1                      | 68  |
| Outside family                       | 65.4                      | 316 |
| Child's sex                          |                           |     |
| Girl                                 | 50.4                      | 253 |
| Boy                                  | 49.6                      | 249 |
| Gestational age (weeks)              |                           |     |
| < 37                                 | 4.2                       | 20  |
| 37                                   | 11.3                      | 54  |
| 38–42                                | 84.5                      | 404 |
| Birth weight (gr)                    |                           |     |
| ≤2500                                | 3.5                       | 10  |
| 2510–3499                            | 59.5                      | 172 |
| 3500–4499                            | 35.3                      | 102 |
| > 4500                               | 1.7                       | 5   |
| Singleton-twin                       |                           |     |
| Singleton                            | 98.6                      | 495 |
| Twins                                | 1.2                       | 6   |
| Triples                              | 0.2                       | 1   |

|                        |      |     |
|------------------------|------|-----|
| Newborn health         |      |     |
| Excellent              | 51.1 | 406 |
| Good                   | 45.5 | 225 |
| Reasonable             | 2.2  | 11  |
| Severe health problems | 0.4  | 2   |
| Child still born       | 0.8  | 4   |
| Birth defect           |      |     |
| ICD 10 diagnosis       | 5.2  | 26  |
| Not defect             | 94.8 | 476 |
| Type of delivery       |      |     |
| Vaginal                | 86.8 | 435 |
| Caesarean              | 13.2 | 66  |

---

<sup>a</sup> Participant numbers differed due to missing data
